# Supplementary material
Source: Springer Nature journal article supplement (https://www.springermedizin.de/resource/supplementary/12879_2008_684_MOESM1_ESM.pdf/9449502)
Supplement: MOESM1 [file 9449502]

**N=1760**

started ART before 01 July 04 and  
satisfy other inclusion/exclusion criteria

**N= 213 (12.1%)**

left the workforce during the first 12 months

**N=175 (9.9%)**

died during the first 12 months

**N=200 (11.4%)**

stopped ART during the first 12 months

**N=219 (12.4%)**

no HIV viral load measurement at 12 months  
and not died, stopped ART or left workforce by  
12 months

**Main analysis: N=953**

Individuals who have an HIV viral load  
measurement at 12 months (n=932) or  
who had started second line therapy  
prior to the 12 month visit (n=21).

ART: antiretroviral therapy
